# Supplementary material for: Human Mast Cell Tryptase Is a Potential Treatment for Snakebite Envenoming Across Multiple Snake Species
Source: PubMed Central journal article supplement (PMC6047305; doi:10.3389/fimmu.2018.01532), 2018-07-09
Supplement: Data_Sheet_1.pdf [file Data_Sheet_1.pdf]

# Protein Report

## Project Info

Name: Venom protein identification 26082013 Date: August 26, 2013

## Sample Info & Protocols

Name: **Southern Copperhead + Tryptase** Date: August 26, 2013

## Search Result Info

| Search Result                                                   | Location                                                                                                  | Search Engine  | Database                                              | Ident. Compounds     |
|-----------------------------------------------------------------|-----------------------------------------------------------------------------------------------------------|----------------|-------------------------------------------------------|----------------------|
| Amazon vertebrates_swissprot<br>july_Mascot_2013-08-28 18:47:18 | /Venom protein identification 26082013/Acc + T 3rd batch 5<br>ul_RC5_01_2660.d/ProteinAnalysisResults.mgf | Mascot, 2.3.02 | SwissProt_July2013,<br>uniprotswissprotJuly2013.fasta | 3/501<br>(FDR:0.00%) |

**Protein 1:** L-amino-acid oxidase (Fragment) OS=Bothrops jararacussu PE=1 SV=1

|                                     |                           |
|-------------------------------------|---------------------------|
| <b>Accession:</b> OXLA_BOTJR        | <b>Score:</b> 70.21       |
| <b>Database:</b> SwissProt_July2013 | <b>MW [kDa]:</b> 56.30    |
| <b>Seq. Coverage [%]:</b> 2.40 %    | <b>pI:</b> 5.73           |
|                                     | <b>No. of Peptides:</b> 2 |

|            |            |            |            |            |            |            |            |            |            |            |            |
|------------|------------|------------|------------|------------|------------|------------|------------|------------|------------|------------|------------|
| 10         | 20         | 30         | 40         | 50         | 60         | 70         | 80         | 90         | 100        | 110        | 120        |
| MNVFFMFSKP | GKLADDRNPL | EECFRETQYE | EFLEIAKNGL | STTSNPKRVV | IVGAGMSGLS | AAYVLANAGH | QVTVLEASER | AGGQVKTYRN | EKEGWYANLG | PMRLPEKHRI | VREYIRKFGI |
| 130        | 140        | 150        | 160        | 170        | 180        | 190        | 200        | 210        | 220        | 230        | 240        |
| QLNEFSQENE | NAWYFIKNI  | KRVGEVKNKP | GVLDPVKPS  | EVGKSAGQLY | EESLQKAVEE | LRRTNCSYML | NKYDTYSTKE | YLLKEGNLSP | GAVDMIGDLL | NEDSGYYVSF | IESLKHDDIF |
| 250        | 260        | 270        | 280        | 290        | 300        | 310        | 320        | 330        | 340        | 350        | 360        |
| AYEKRFDEIV | GGMDKLPTSM | YQAIQEKVHL | NARVIKIQQD | VKEVTVTYQT | SEKETLSVTA | DYVIVCTTSR | AARRIKFEPP | LPPKKAHALR | SVHYRSGTKI | FLTCTKKFWE | DDGIHGGKST |
| 370        | 380        | 390        | 400        | 410        | 420        | 430        | 440        | 450        | 460        | 470        | 480        |
| TDLPSRFIYY | PNHNFPNGVG | VIIAYGIGDD | ANYFEALDFE | DCGDIVINDL | SLIHQLPKEE | IQAICRPSMI | QRWSLDKYAM | GGITFTTPYQ | FQHFSEALTA | PVDRIYFAGE | YTAQAHGWIA |
| 490        | 500        |            |            |            |            |            |            |            |            |            |            |
| STIKSGPEGL | DVNRASE    |            |            |            |            |            |            |            |            |            |            |

| Cmpd. | No. of Cmpds. | m/z meas. | Δ m/z [ppm] | z | Rt [min] | Score | P | Range   | Sequence        | Modification |
|-------|---------------|-----------|-------------|---|----------|-------|---|---------|-----------------|--------------|
| 148   | 1             | 441.3400  | 155.90      | 3 | 29.0     | 27.7  | 2 | 314-324 | R.RIKFEPPLPPK.K |              |
| 137   | 2             | 432.0000  | 148.58      | 3 | 27.8     | 26.9  | 2 | 315-325 | R.IKFEPPLPPK.A  |              |

# Protein Report

## Project Info

Name: Venom protein identification 26082013 Date: August 26, 2013  
 Sample Info & Protocols Date: August 26, 2013

Name: **Common lancehead + Trypsase**

## Search Result Info

| Search Result                                                   | Location                                                                                                    | Search Engine  | Database                                              | Ident. Compounds     |
|-----------------------------------------------------------------|-------------------------------------------------------------------------------------------------------------|----------------|-------------------------------------------------------|----------------------|
| Amazon vertebrates_swissprot<br>july_Mascot_2013-08-28 18:47:18 | /Venom protein identification 26082013/Ba + T 2nd<br>batch 7<br>ul_BA5_01_2683.d/ProteinAnalysisResults.mgf | Mascot, 2.3.02 | SwissProt_July2013,<br>uniprotswissprotJuly2013.fasta | 4/501<br>(FDR:0.00%) |

Protein 1: **L-amino-acid oxidase (Fragment) OS=Bothrops jararacussu PE=1 SV=1**

Accession: OXLA\_BOTJR Score: 146.69  
 Database: SwissProt\_July2013 MW [kDa]: 56.30  
 Seq. Coverage [%]: 6.20 % pI: 5.73  
 No. of Peptides: 4

|            |            |            |            |            |            |            |             |            |            |            |            |
|------------|------------|------------|------------|------------|------------|------------|-------------|------------|------------|------------|------------|
| 10         | 20         | 30         | 40         | 50         | 60         | 70         | 80          | 90         | 100        | 110        | 120        |
| MNVFFMFSKP | GKLADDRNPL | EECFRETDYE | EFLEIAKNGL | STTSNPKRVV | IVGAGMSGLS | AAYVLANAGH | QVTVLEASER  | AGGQVKTYRN | EKEGWYANLG | PMRLPEKHRI | VREYIRKFGI |
| 130        | 140        | 150        | 160        | 170        | 180        | 190        | 200         | 210        | 220        | 230        | 240        |
| QLNEFSQENE | NAWYFIKIR  | KRVGEVKNKP | GVLDPVKPVS | EVGKSAGQLY | EESLQKAVEE | LRRTNCSYML | NKYDITYSTKE | YLLKEGNLSP | GAVDMIGDLL | NEDSGYVVSF | IESLKHDDIF |
| 250        | 260        | 270        | 280        | 290        | 300        | 310        | 320         | 330        | 340        | 350        | 360        |
| AYEKRFDEIV | GGMDKLPTSM | YQAIQEKVHL | NARVIKIQQD | VKEVTVTYQT | SEKETLSVTA | DYVIVCTTSR | AARRIKFEP   | LPPKKAHALR | SVHYRSGTKI | FLTCTKFW   | DDGIHGGKST |
| 370        | 380        | 390        | 400        | 410        | 420        | 430        | 440         | 450        | 460        | 470        | 480        |
| TDLPSRFIYY | PNHNFNGVG  | VIIAYGIGDD | ANYFEALDFE | DCGDIVINDL | SLIHQLPKEE | IQAICRPSMI | QRWSLDKYAM  | GGITTFPTYQ | FQHFSEALTA | PVDRIYFAGE | YTAQAHGWIA |
| 490        | 500        |            |            |            |            |            |             |            |            |            |            |
| STIKSGPEGL | DVNRASE    |            |            |            |            |            |             |            |            |            |            |

| Cmpd. | No. of Cmpds. | m/z meas. | Δ m/z [ppm] | z | Rt [min] | Score | P | Range   | Sequence         | Modification |
|-------|---------------|-----------|-------------|---|----------|-------|---|---------|------------------|--------------|
| 165   | 2             | 441.3500  | 178.56      | 3 | 28.2     | 34.7  | 2 | 314-324 | R.RIKFEPPLPPK.K  |              |
| 114   | 1             | 463.6000  | 90.68       | 3 | 22.5     | 47.9  | 1 | 347-358 | K.KFWEDDGIHGGK.S |              |
| 125   | 1             | 420.9300  | 167.17      | 3 | 23.6     | 37.1  | 0 | 348-358 | K.FWEDDGIHGGK.S  |              |
| 57    | 1             | 438.7800  | 126.03      | 2 | 15.9     | 27.0  | 0 | 359-366 | K.STTDLPSR.F     |              |



# Protein Report

## Project Info

Name: venom protein identification 27082013

Date: August 27, 2013

## Sample Info & Protocols

Name: **Western diamondback rattlesnake + Tryptase**

Date: August 27, 2013

## Search Result Info

| Search Result                                                   | Location                                                                                                      | Search Engine  | Database                                              | Ident. Compounds     |
|-----------------------------------------------------------------|---------------------------------------------------------------------------------------------------------------|----------------|-------------------------------------------------------|----------------------|
| Amazon vertebrates_swissprot<br>july_Mascot_2013-08-28 18:47:40 | /venom protein identification 27082013 /Ca +<br>Tryptase_II_BE2_01_2132.d/Ca +<br>Tryptase_II_BE2_01_2132.mgf | Mascot, 2.3.02 | SwissProt_July2013,<br>uniprotswissprotJuly2013.fasta | 6/484<br>(FDR:0.00%) |

**Protein 1:** Snake venom metalloproteinase atrolysin-C OS=Crotalus atrox PE=1 SV=1

|                           |                    |                         |       |
|---------------------------|--------------------|-------------------------|-------|
| <b>Accession:</b>         | VM1AC_CROAT        | <b>Score:</b>           | 90.91 |
| <b>Database:</b>          | SwissProt_July2013 | <b>MW [kDa]:</b>        | 46.70 |
| <b>Seq. Coverage [%]:</b> | 3.90 %             | <b>pI:</b>              | 4.85  |
|                           |                    | <b>No. of Peptides:</b> | 2     |

|            |            |            |            |            |            |            |             |            |            |            |            |
|------------|------------|------------|------------|------------|------------|------------|-------------|------------|------------|------------|------------|
| 10         | 20         | 30         | 40         | 50         | 60         | 70         | 80          | 90         | 100        | 110        | 120        |
| MIEVVLVTIC | LAVFPYQGSS | IILESGNVND | YEVVYPRKVT | ALPKGAVQPK | YEDAMQYELK | VNGEPVVLHL | EKNKELFSKD  | YSETHYSPDG | RKITTNPSVE | DHCYRGRIE  | NDADSTASIS |
| 130        | 140        | 150        | 160        | 170        | 180        | 190        | 200         | 210        | 220        | 230        | 240        |
| ACNGLKGHFK | LQGELYLIEP | LELSDSEAHA | VFKLENVEKE | DEAPKMGVVT | QNWESYEPIK | KASDLNLPD  | QQNLPQRYIE  | LVVVADHRVF | MKYNSDLNTI | RTRVHEIVNF | INGFYRSLNI |
| 250        | 260        | 270        | 280        | 290        | 300        | 310        | 320         | 330        | 340        | 350        | 360        |
| HVSLTDLEIW | SNEDQINIQS | ASSDTLNAFA | EWRETDLLNR | KSHDNAQLLT | AIELDEETLG | LAPLGTMCDP | KL SIGIVQDH | SPINLLMGVT | MAHELGHNLG | MEHDGKDCLR | GASLCIMRPG |
| 370        | 380        | 390        | 400        | 410        | 420        |            |             |            |            |            |            |
| LTKGRSYEFS | ADSMHYERF  | LKQYKQCIL  | NKPLRIDPVS | TPVSGNELLE | AGEE       |            |             |            |            |            |            |

| Cmpd. | No. of Cmpds. | m/z meas. | $\Delta$ m/z [ppm] | z | Rt [min] | Score | P | Range   | Sequence      | Modification |
|-------|---------------|-----------|--------------------|---|----------|-------|---|---------|---------------|--------------|
| 98    | 1             | 548.2400  | -64.01             | 2 | 22.2     | 64.5  | 0 | 213-221 | K.YNSDLNTIR.T |              |
| 80    | 1             | 430.6700  | -132.91            | 2 | 21.3     | 26.4  | 0 | 274-280 | R.ETDLLNR.K   |              |

# Protein Report

L-amino-acid oxidase OS=Crotalus adamanteus PE=1 SV=1

**Protein 2:**

**Accession:**

OXLA\_CROAD

**Score:**

65.46

**Database:**

SwissProt\_July2013

**MW [kDa]:**

58.60

**Seq. Coverage [%]:**

3.30 %

**pl:**

6.32

**No. of Peptides:**

2

|            |            |             |            |            |            |            |            |            |            |            |            |
|------------|------------|-------------|------------|------------|------------|------------|------------|------------|------------|------------|------------|
| 10         | 20         | 30          | 40         | 50         | 60         | 70         | 80         | 90         | 100        | 110        | 120        |
| MNVFFMFSLL | FLAALGSCAH | DRNPLEECFR  | ETDYEEFLEI | AKNGLTATSN | PKRVVIVGAG | MAGLSAAYVL | AGAGHQVTVL | EASERVGGRV | RTYRKKDWYA | NLGPMLPTK  | HRIVREYIKK |
| 130        | 140        | 150         | 160        | 170        | 180        | 190        | 200        | 210        | 220        | 230        | 240        |
| FDLKLNFSQ  | ENENAWYFIK | NIRKRVREVK  | NNPGLLEYPV | KPSEEGKSAA | QLYVESLRKV | VEELRSTNCK | YILDKYDTYS | TKEYLLKEGN | LSPGAVDMIG | DLLNEDSGYY | VSFIESLKHD |
| 250        | 260        | 270         | 280        | 290        | 300        | 310        | 320        | 330        | 340        | 350        | 360        |
| DIFGYEKRFD | EIVGGMDQLP | TSMYEAIKEK  | VQVHFNARVI | EQQNDREAT  | VTYQTSANEM | SSVTADYVIV | CTTSRAARRI | KFEPPLPPKK | AHALRSVHYR | SGTKIFLTCT | KKFWEDDGIH |
| 370        | 380        | 390         | 400        | 410        | 420        | 430        | 440        | 450        | 460        | 470        | 480        |
| GGKSTTDLPS | RFIYYPNHNF | TSGVGVI IAY | GIGDDANFFQ | ALDFKDCADI | VINDLSLIHE | LPKEDIQTFC | HPSMIQRWSL | DKYAMGGITT | FTPYQFQHFS | EALTAPFKRI | YFAGEYTAQF |
| 490        | 500        | 510         | 520        |            |            |            |            |            |            |            |            |
| HGWIDSTIKS | GLTAARDVNR | ASENPSGIHL  | SNDNEF     |            |            |            |            |            |            |            |            |

| Cmpd. | No. of Cmpds. | m/z meas. | Δ m/z [ppm] | z | Rt [min] | Score | P | Range   | Sequence      | Modification |
|-------|---------------|-----------|-------------|---|----------|-------|---|---------|---------------|--------------|
| 71    | 2             | 557.7900  | -11.11      | 2 | 20.0     | 35.7  | 0 | 279-287 | R.VIEIQQNDR.E |              |
| 21    | 3             | 438.6800  | -101.90     | 2 | 16.1     | 29.8  | 0 | 364-371 | K.STTDLPSR.F  |              |

# Protein Report

**Protein 3:** Snake venom metalloproteinase adamalysin-2 OS=Crotalus adamanteus PE=1 SV=2  
**Accession:** VM1A2\_CROAD **Score:** 62.52  
**Database:** SwissProt\_July2013 **MW [kDa]:** 23.10  
**Seq. Coverage [%]:** 4.40 % **pI:** 9.58  
**No. of Peptides:** 1

|            |            |                    |            |            |            |            |            |            |            |            |            |
|------------|------------|--------------------|------------|------------|------------|------------|------------|------------|------------|------------|------------|
| 10         | 20         | 30                 | 40         | 50         | 60         | 70         | 80         | 90         | 100        | 110        | 120        |
| QQNLPQRYIE | LVVVADRRVF | MK <b>YNSDLNII</b> | RTRVHEIVNI | INGFYRSLNI | DVSLVNLEIW | SGQDPLTIQS | SSSNTLNSEG | LWREKVLLNK | KKKDNAQLLT | AIEFKCETLG | KAYLNSMCNP |
| 130        | 140        | 150                | 160        | 170        | 180        | 190        | 200        | 210        |            |            |            |
| RSSVGIVKDH | SPINLLVAVT | MAHELGHNLG         | MEHDGKDCLR | GASLCIMRPG | LTPGRSYEFS | DDSMGYQKF  | LNQYKQCIL  | NKP        |            |            |            |

| Cmpd. | No. of Cmpds. | m/z meas. | $\Delta$ m/z [ppm] | z | Rt [min] | Score | P | Range | Sequence      | Modification |
|-------|---------------|-----------|--------------------|---|----------|-------|---|-------|---------------|--------------|
| 204   | 2             | 554.2800  | -23.97             | 2 | 29.7     | 62.5  | 0 | 23-31 | K.YNSDLNIIR.T |              |

# Protein Report

## Project Info

Name: venom protein identification 27082013

Date: August 27, 2013

## Sample Info & Protocols

Date: August 27, 2013

Name: **Russell's viper + Trypsase**

## Search Result Info

| Search Result                                                   | Location                                                                                                      | Search Engine  | Database                                              | Ident. Compounds     |
|-----------------------------------------------------------------|---------------------------------------------------------------------------------------------------------------|----------------|-------------------------------------------------------|----------------------|
| Amazon vertebrates_swissprot<br>july_Mascot_2013-08-28 18:47:40 | /venom protein identification 27082013 /Dr +<br>Trypsase_II_BE4_01_2134.d/Dr +<br>Trypsase_II_BE4_01_2134.mgf | Mascot, 2.3.02 | SwissProt_July2013,<br>uniprotswissprotJuly2013.fasta | 4/501<br>(FDR:0.00%) |

**Protein 1:** L-amino-acid oxidase OS=Daboia russelii PE=1 SV=1

**Accession:** OXLA\_DABRR

**Score:** 96.50

**Database:** SwissProt\_July2013

**MW [kDa]:** 56.90

**Seq. Coverage [%]:** 5.00 %

**pl:** 8.55

**No. of Peptides:** 2

|            |            |            |             |            |              |            |            |            |            |            |            |
|------------|------------|------------|-------------|------------|--------------|------------|------------|------------|------------|------------|------------|
| 10         | 20         | 30         | 40          | 50         | 60           | 70         | 80         | 90         | 100        | 110        | 120        |
| MNVFFMFSLL | FLATLGSCAD | DKNFLEECFR | EDDYEEFLEI  | AKNGLKRTSN | PKHIVIVGAG   | MSGLSAAYVL | AGAGHKVTVL | EASERPGGRV | RTHRNKVEGW | YANLGPMPRV | EKHRIIREYI |
| 130        | 140        | 150        | 160         | 170        | 180          | 190        | 200        | 210        | 220        | 230        | 240        |
| RKFGKLNLF  | VQETENGWYF | IKNIRKRVGE | VKIDPGLLKY  | PVKPSEAGKS | AGQLYQESLG   | KAVELKRTN  | CSYILNKYDT | YSTKEYLIKE | GNLSPGAVDM | IGDLLNEDSG | YVVSFIESLK |
| 250        | 260        | 270        | 280         | 290        | 300          | 310        | 320        | 330        | 340        | 350        | 360        |
| HDDIFAYEKR | FDEIVGGMDQ | LPTSMYRAIE | ESVHFVKARVI | KIQQNAEKVT | VTVYQTTQK.NL | LLETADYVIV | CTTSRAARRI | TFKPLPPPK  | AHALRSVHYR | SGTKIFLTCT | KKFWEDDGIQ |
| 370        | 380        | 390        | 400         | 410        | 420          | 430        | 440        | 450        | 460        | 470        | 480        |
| GKSTTDLPS  | RFIYYPNHNE | TGVGVIILAY | GIGDDANFFQ  | ALNLNECADI | VFNDLSSIHQ   | LPKKDLQTFC | YPSIIQKWSL | DKYAMGAIIT | FTFYQFHFS  | EALTAPVGRV | FFAGEYTANA |
| 490        | 500        | 510        |             |            |              |            |            |            |            |            |            |
| HGWIDSTIKS | GLTAARDVNR | ASEL       |             |            |              |            |            |            |            |            |            |

| Cmpd. | No. of Cmpds. | m/z meas. | $\Delta$ m/z [ppm] | z | Rt [min] | Score | P | Range   | Sequence            | Modification |
|-------|---------------|-----------|--------------------|---|----------|-------|---|---------|---------------------|--------------|
| 50    | 2             | 584.7800  | -58.23             | 2 | 18.7     | 49.9  | 0 | 289-298 | K.VTVTYQTTQK.N      |              |
| 147   | 1             | 520.5800  | -56.45             | 3 | 24.9     | 30.8  | 2 | 490-504 | K.SGLTAARDVNRASEL.- |              |

# Protein Report

**Protein 2:** Protease inhibitor 2 OS=Daboia russelii PE=2 SV=1  
**Accession:** IVBI2\_DABRR **Score:** 63.36  
**Database:** SwissProt\_July2013 **MW [kDa]:** 9.70  
**Seq. Coverage [%]:** 13.10 % **pI:** 9.84  
**No. of Peptides:** 2

10 20 30 40 50 60 70 80 90  
 MSSGGLLLLL GLLTLWAEPT PISGQDRPKF CFLRPDFGRY GHPRPRFYYN PATNQCQGL AQRSE**ENTNN** **FDTRDKCRQT** CGRK  


| Cmpd. | No. of Cmpds. | m/z meas. | $\Delta$ m/z [ppm] | z | Rt [min] | Score | P | Range | Sequence        | Modification |
|-------|---------------|-----------|--------------------|---|----------|-------|---|-------|-----------------|--------------|
| 19    | 4             | 555.7300  | -25.48             | 2 | 15.0     | 41.5  | 0 | 66-74 | R.ENTNNFDTR.D   |              |
| 12    | 1             | 677.2500  | -81.37             | 2 | 13.5     | 23.1  | 1 | 66-76 | R.ENTNNFDTRDK.C |              |



# Protein Report

## Project Info

Name: venom protein identification 27082013

Date: August 27, 2013

## Sample Info & Protocols

Name: **Saw-scaled viper + Tryptase**

Date: August 27, 2013

## Search Result Info

| Search Result                                                   | Location                                                                                             | Search Engine  | Database                                              | Ident. Compounds     |
|-----------------------------------------------------------------|------------------------------------------------------------------------------------------------------|----------------|-------------------------------------------------------|----------------------|
| Amazon vertebrates_swissprot<br>july_Mascot_2013-08-28 18:47:40 | /venom protein identification /Ec +<br>Tryptase_II_BE6_01_2137.d/Ec +<br>Tryptase_II_BE6_01_2137.mgf | Mascot, 2.3.02 | SwissProt_July2013,<br>uniprotswissprotJuly2013.fasta | 1/445<br>(FDR:0.00%) |

**Protein 1:** L-amino-acid oxidase OS=Vipera ammodytes ammodytes PE=1 SV=1

|                                     |                           |
|-------------------------------------|---------------------------|
| <b>Accession:</b> OXLA_VIPAA        | <b>Score:</b> 48.50       |
| <b>Database:</b> SwissProt_July2013 | <b>MW [kDa]:</b> 54.70    |
| <b>Seq. Coverage [%]:</b> 1.90 %    | <b>pl:</b> 7.71           |
|                                     | <b>No. of Peptides:</b> 1 |

|            |            |            |            |            |            |            |            |            |            |            |            |
|------------|------------|------------|------------|------------|------------|------------|------------|------------|------------|------------|------------|
| 10         | 20         | 30         | 40         | 50         | 60         | 70         | 80         | 90         | 100        | 110        | 120        |
| DRNPLEECFR | ETDYEEFLEI | ARNGLKKTSN | PKHVVVVGAG | MSGLSAAYVL | AGAGHKVTVL | EASERAGGRV | RTHRNSKEGW | YANLGPMRIP | EKHRIVREYI | RKFGNLNNEF | SQENDNAWYF |
| 130        | 140        | 150        | 160        | 170        | 180        | 190        | 200        | 210        | 220        | 230        | 240        |
| IKNIRKRVGE | VNKDPGLLKY | PVKPSEEGKS | AGQLYEESLG | SAVKDLKRTN | CSYILNKYDT | YSTKEYLIKE | GNLSPGAVDM | IGDLLNEDSG | YYVSFIESLK | HDDIFAYEKR | FDEIVGGMDQ |
| 250        | 260        | 270        | 280        | 290        | 300        | 310        | 320        | 330        | 340        | 350        | 360        |
| LPTSMYRAIE | EKVKFNARVI | KIQQNANQVT | VTYQTPEKDT | SSNTADYVIV | CTTSRAARRI | QFEPPLPPKK | QHALRSVHYR | SGTKIFLTCS | SKFWEDDGIH | GGKSTDLPS  | RFIYYPNHNF |
| 370        | 380        | 390        | 400        | 410        | 420        | 430        | 440        | 450        | 460        | 470        | 480        |
| STGVGVIIAY | GIGDDANFFQ | ALKFKDCADI | VFNDLSLIHQ | LPKEEIQSFC | YPSMIQKWSL | DKYAMGAIIT | FTPYQFQRF  | EALTAPQGR  | FFAGEYTAEA | HGWIDSTIKS | GLTAARDVNR |
| 490        |            |            |            |            |            |            |            |            |            |            |            |

ASEQ

| Cmpd. | No. of Cmpds. | m/z meas. | $\Delta$ m/z [ppm] | z | Rt [min] | Score | P | Range | Sequence      | Modification |
|-------|---------------|-----------|--------------------|---|----------|-------|---|-------|---------------|--------------|
| 62    | 3             | 502.2200  | -108.63            | 2 | 22.1     | 48.5  | 0 | 57-65 | K.VTVLEASER.A |              |
